# Supplementary material for: Active targeting co-delivery of therapeutic Sur siRNA and an antineoplastic drug via epidermal growth factor receptor-mediated magnetic nanoparticles for synergistic programmed cell death in glioblastoma stem cells
Source: Royal Society of Chemistry journal article supplement (doi:10.1039/c9qm00666d), 2019-12-14
Supplement: c9qm00666d1.pdf [file c9qm00666d1.pdf]

## Supplementary Information

### **Active targeting co-delivery of therapeutic *Sur* siRNA and antineoplastic drug via epidermal growth factor receptor mediated magnetic nanoparticles for synergistic programmed cell death in glioblastoma stem cells**

Xueqin Wang<sup>\*a</sup>, Ruifang Li<sup>a</sup>, Yongxia Zhu<sup>b</sup>, Zichao Wang<sup>a</sup>, Huiru Zhang<sup>a</sup>, Liuqing Cui<sup>a</sup>,

Shaofeng Duan<sup>\*c</sup>, Yuqi Guo<sup>\*b</sup>

<sup>a</sup> College of Bioengineering, Henan University of Technology, Zhengzhou, Henan 450001, P. R. China. <sup>b</sup>Henan Provincial People's Hospital, Zhengzhou 450003, P. R. China. <sup>c</sup>School of Pharmacy, Henan University, Kaifeng, Henan 475004, P. R. China.

\* Corresponding authors: Xueqin Wang, E-mail address: [wangxq0708@163.com](mailto:wangxq0708@163.com), College of Bioengineering, Henan University of Technology, Zhengzhou, Henan 450001, P. R. China. Shaofeng Duan, E-mail address: [sduan@henu.edu.cn](mailto:sduan@henu.edu.cn), Tel.: + 86 371 22822134; fax: + 86 371 22822134; Yuqi Guo, E-mail address: [yuqi-guo@163.com](mailto:yuqi-guo@163.com), Tel.: + 86 371 65580059; fax: + 86 371 65580059

This supporting information provides all of the additional information as noted in the manuscript and more detailed discussion of the current study.

### **Synthesis of $\gamma$ -Fe<sub>2</sub>O<sub>3</sub> magnetic nanoparticles**

$\gamma$ -Fe<sub>2</sub>O<sub>3</sub> magnetic nanoparticles used in this study were synthesized from magnetite (Fe<sub>3</sub>O<sub>4</sub>) according to methods proposed elsewhere[1,2]. First, 4.5 mL FeCl<sub>3</sub> (2 M dissolved in 2 M HCl) was added to 15.5 mL DI water, and then 3 mL Na<sub>2</sub>SO<sub>3</sub> (1 M) was added dropwise into the mixture within 1 min with stirring. When the color of the solution changed from red to light yellow, it was added to 120 mL of NH<sub>4</sub>OH solution (0.85 M) with vigorous stirring. A black precipitate quickly formed and was allowed to crystallize completely for another 40 min. After washed with deoxygenated water, the black precipitate was diluted to 252 mL (with a mass concentration of 3 mg/mL) and was adjusted to pH 3.0 with HCl (0.1 M). The suspension was then heated to 90 °C in 5 min, and was stirred under aeration (with air) for 90 min at 110 °C. The color of the suspension slowly changed from black to reddish-brown. After washing with DI water by magnetic decantation, the reddish-brown precipitate was dried to a powder of  $\gamma$ -Fe<sub>2</sub>O<sub>3</sub>.

**The PEI content coupled with the MNNS analysis** The amount of PEI coupled with the MNNS was measured with the ninhydrin chromogenic method as previously described [3]. The standard curve was first established, and the absorbance at 570 nm was determined by ultraviolet-visible spectrophotometer (NanoDrop 2000, themro) and PEI content was calculated three times after adding 0.1% indene 1 mL of indene in 95 °C water bath for 5 min.

### **Stability and magnetic response analysis of eMNNS**

The dispersion stability and magnetic response to an external magnetic field of the fabricated eMNNS was evaluated with transmittance in RPMI-1640 medium, PBS solution (pH7.4), and DI water at different time points using ultraviolet-visible spectrophotometer (NanoDrop 2000, themro).

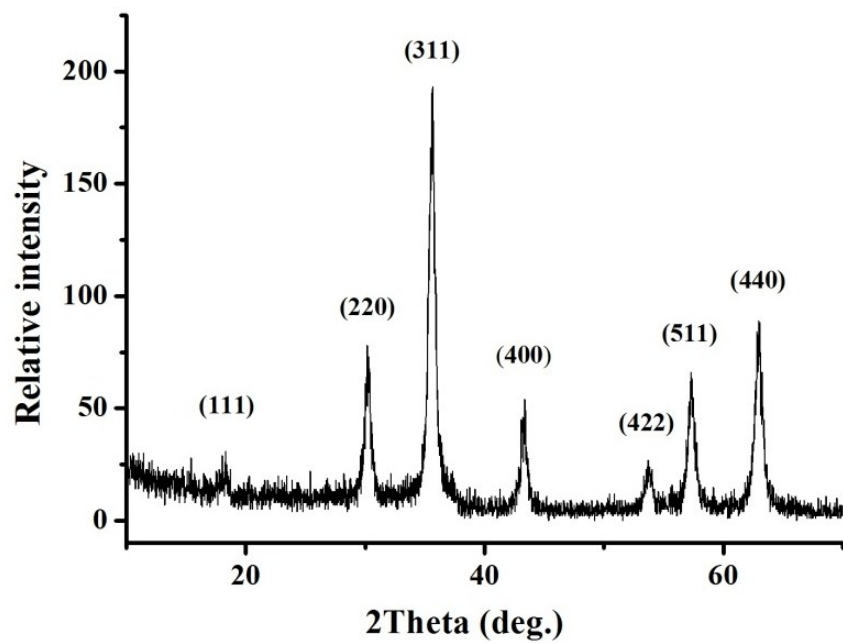

Figure S1. XRD pattern of SPIO NPs.

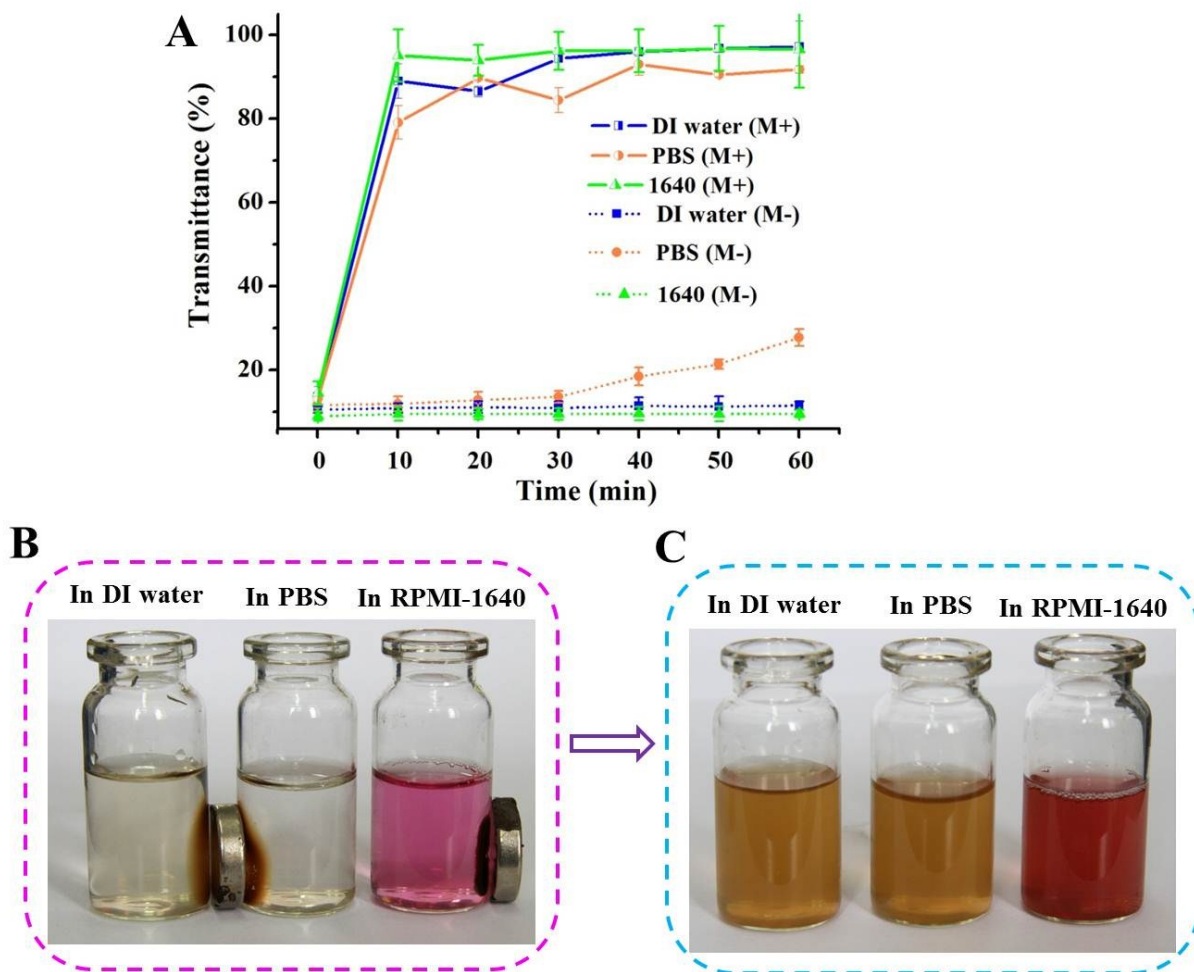

**Figure S2.** (A) The stability and magnetic responsiveness of eMNNS to an external magnetic field in different media, including DI water, PBS (pH 7.4), and RPMI-1640 culture medium. Magnetic field (M+), without applied magnetic field (M-). Optical photos of the magnetic-responsive aggregation and redispersion of the prepared eMNNS in an aqueous suspension by adding and removing an external magnetic field (B&C).

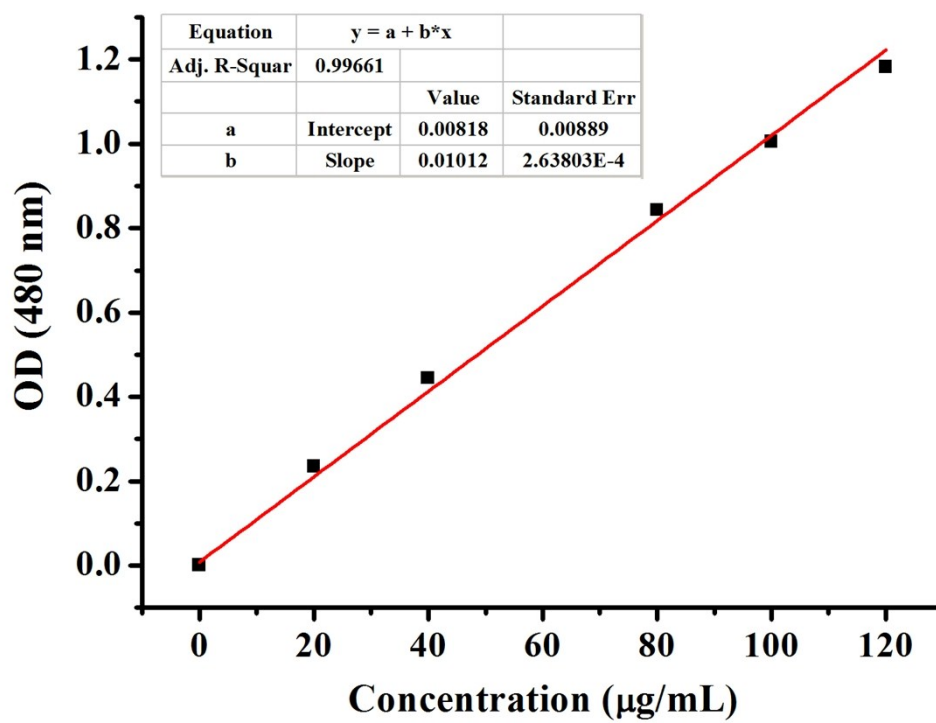

Figure S3. The calibration curve of DOX content.

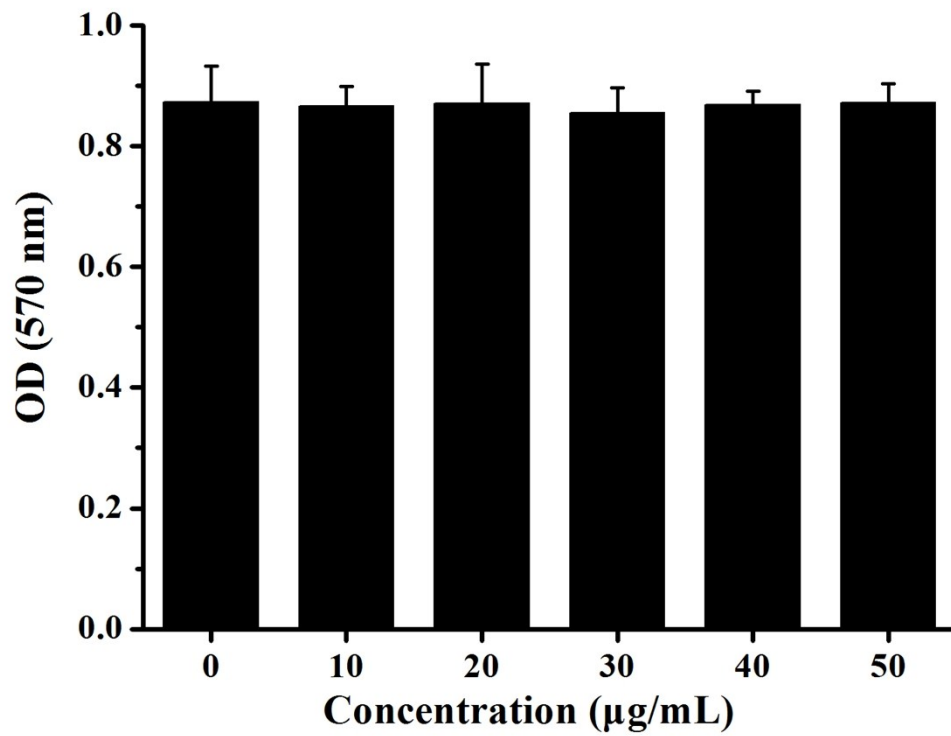

**Figure S4.** The growth of GSCs after treatment with different concentration eMNNS from 0 to 50 µg/mL, and were measured by MTT assay after incubation for 24 h.

## References

- [1] S. Qu, H. Yang, D. Ren, S. Kan, G. Zou, D. Li, M. Li, Magnetite nanoparticles prepared by precipitation from partially reduced ferric chloride aqueous solutions, *J. Colloid Interface Sci.* 215 (1999) 190–192.
- [2] Y. K. Sun, M. Ma, Y. Zhang, N. Gu, Synthesis of nanometer-size maghemite particles from magnetite, *Colloids Surf. A Physicochem Eng. Aspects* 245 (2004) 15–19.
- [3] Friedman M, Applications of the ninhydrin reaction for analysis of amino acids, peptides, and proteins to agricultural and biomedical sciences, *J. Agric. Food Chem.* 52 (2004) 385–406.
